# Supplementary material for: MicroRNAs in Colon Tissue of Pediatric Ulcerative Pancolitis Patients Allow Detection and Prognostic Stratification
Source: PubMed Central journal article supplement (PMC8005023; doi:10.3390/jcm10061325), 2021-03-23
Supplement: jcm-10-01325-s001.pdf [file jcm-10-01325-s001.pdf]

## Supplementary Figure 1

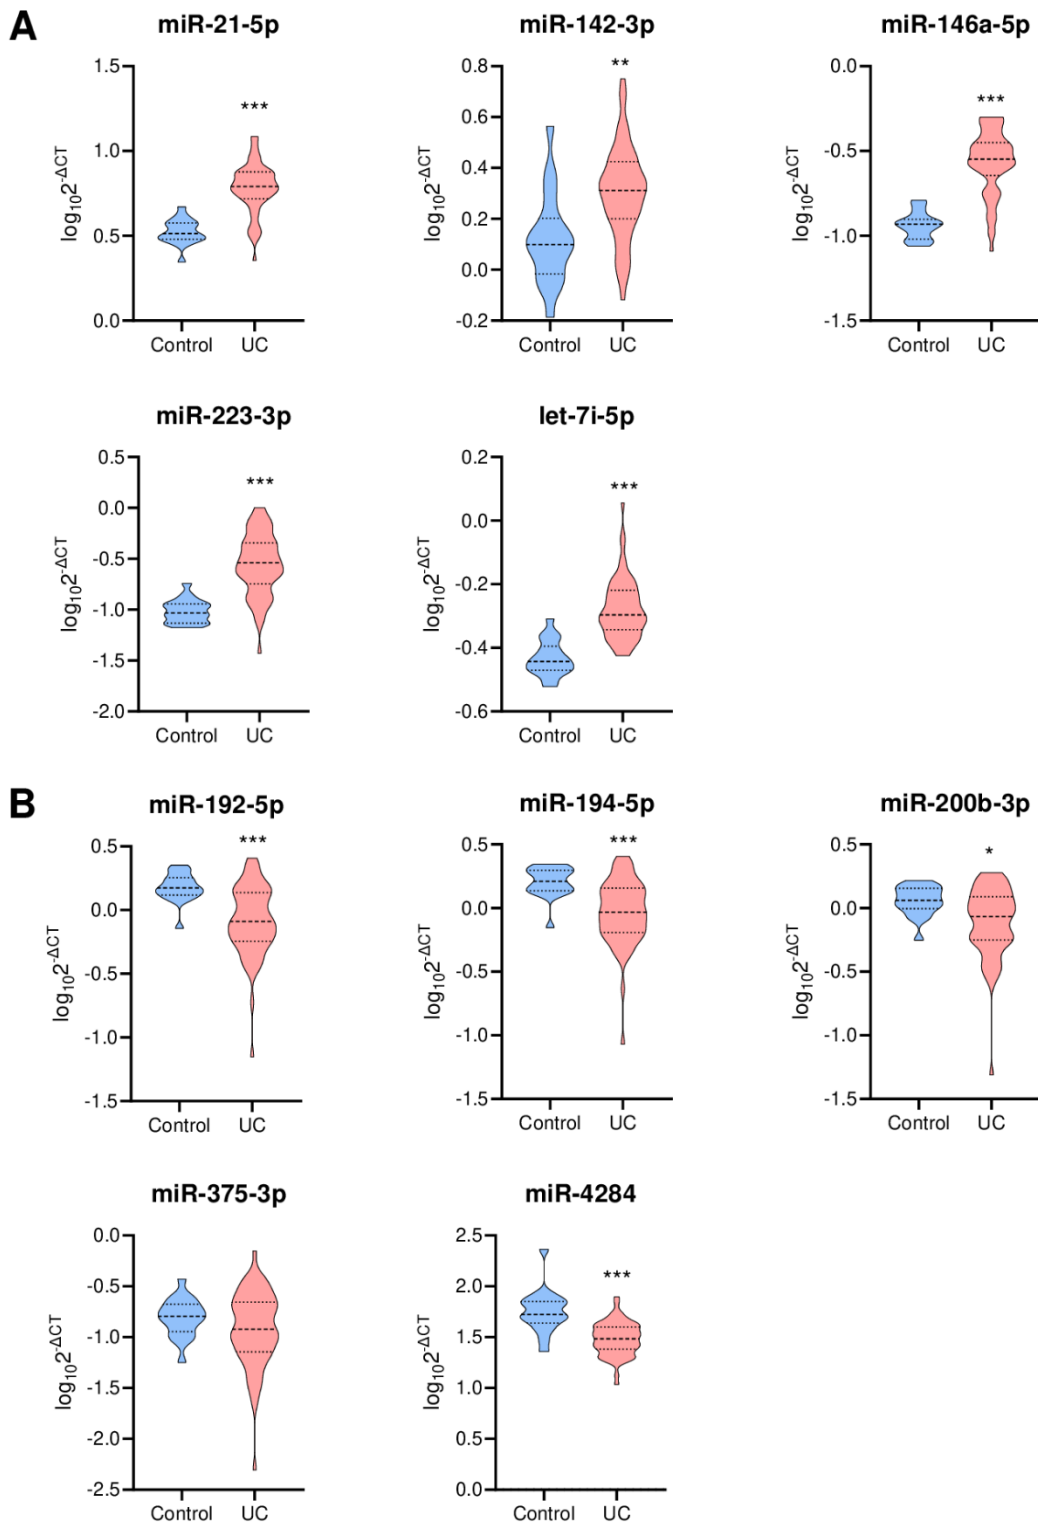

**Supplementary Figure S1.** Expression of 10 selected miRNAs.

Violin plots indicating expression of each miRNA. Blue and red violins indicate controls and ulcerative colitis (UC) patients, respectively. Thick dotted line, median; thin dotted line 25% and 75% quartiles. Y-axis is defined as  $\log_{10}(2^{\Delta CT})$ . \* $p < 0.05$ , \*\* $p < 0.01$ , \*\*\* $p < 0.001$  versus control.

## Supplementary Figure 2

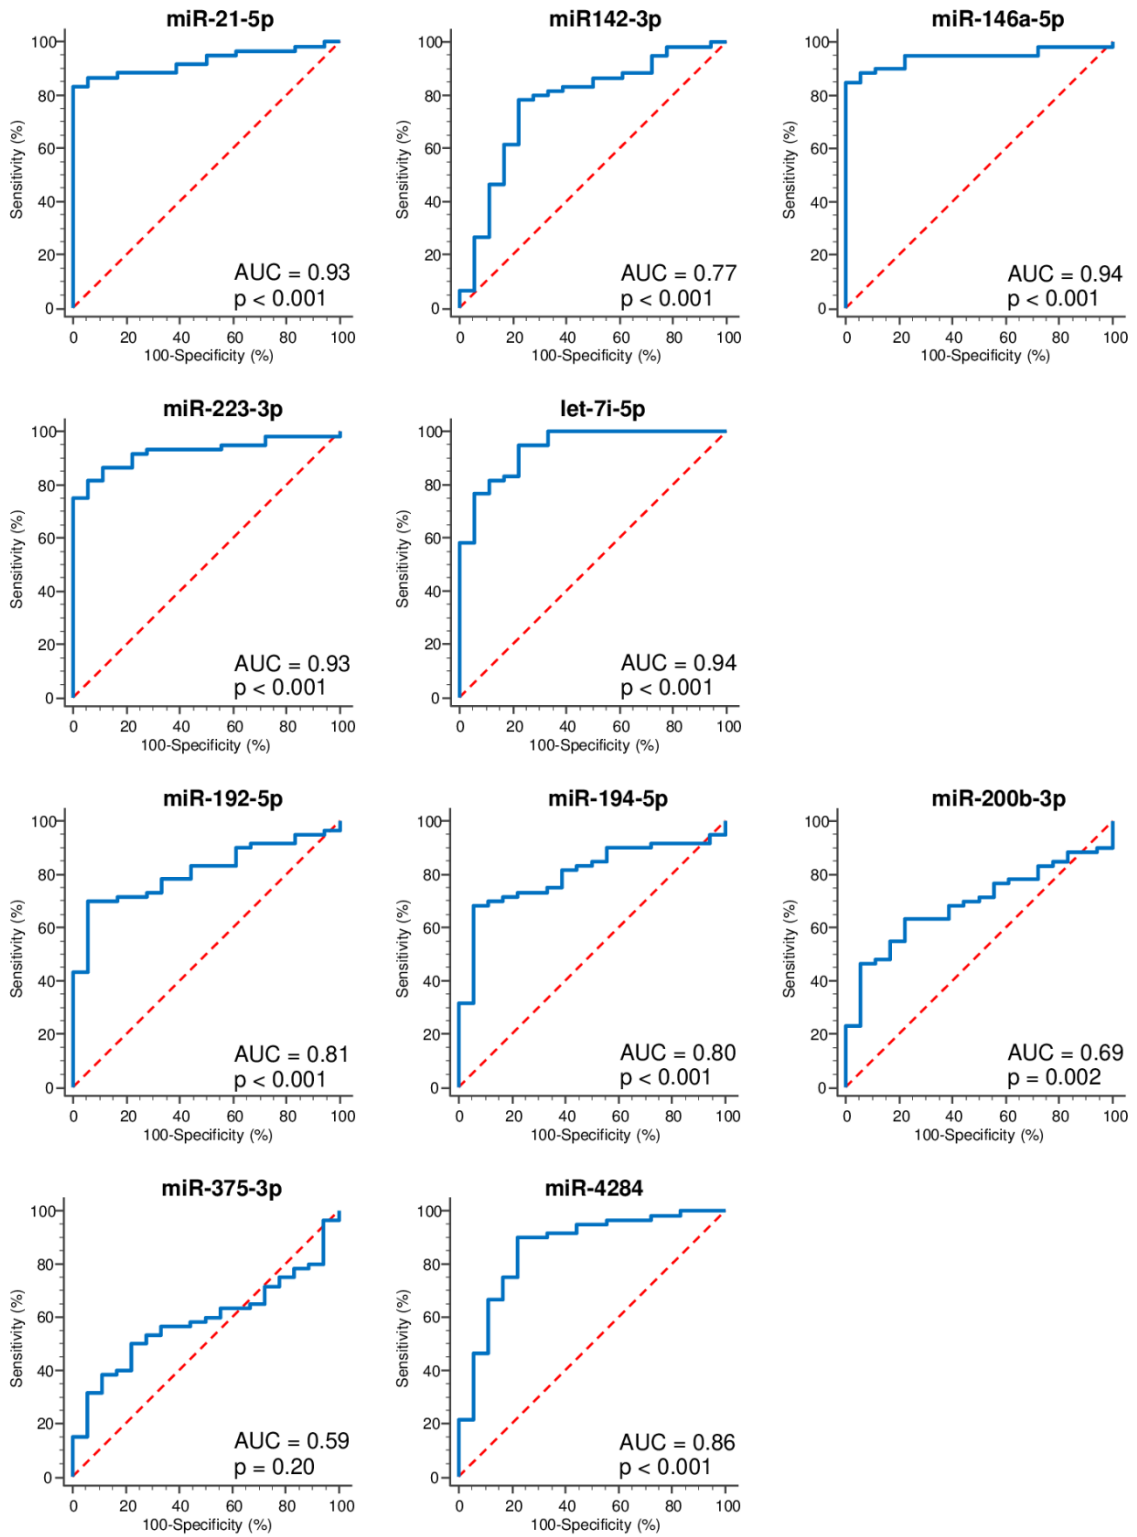

**Supplementary Figure S2.** Receiver operating characteristic (ROC) curves for 10 individual miRNAs for distinguishing UC patients from controls.

### Supplementary Figure 3

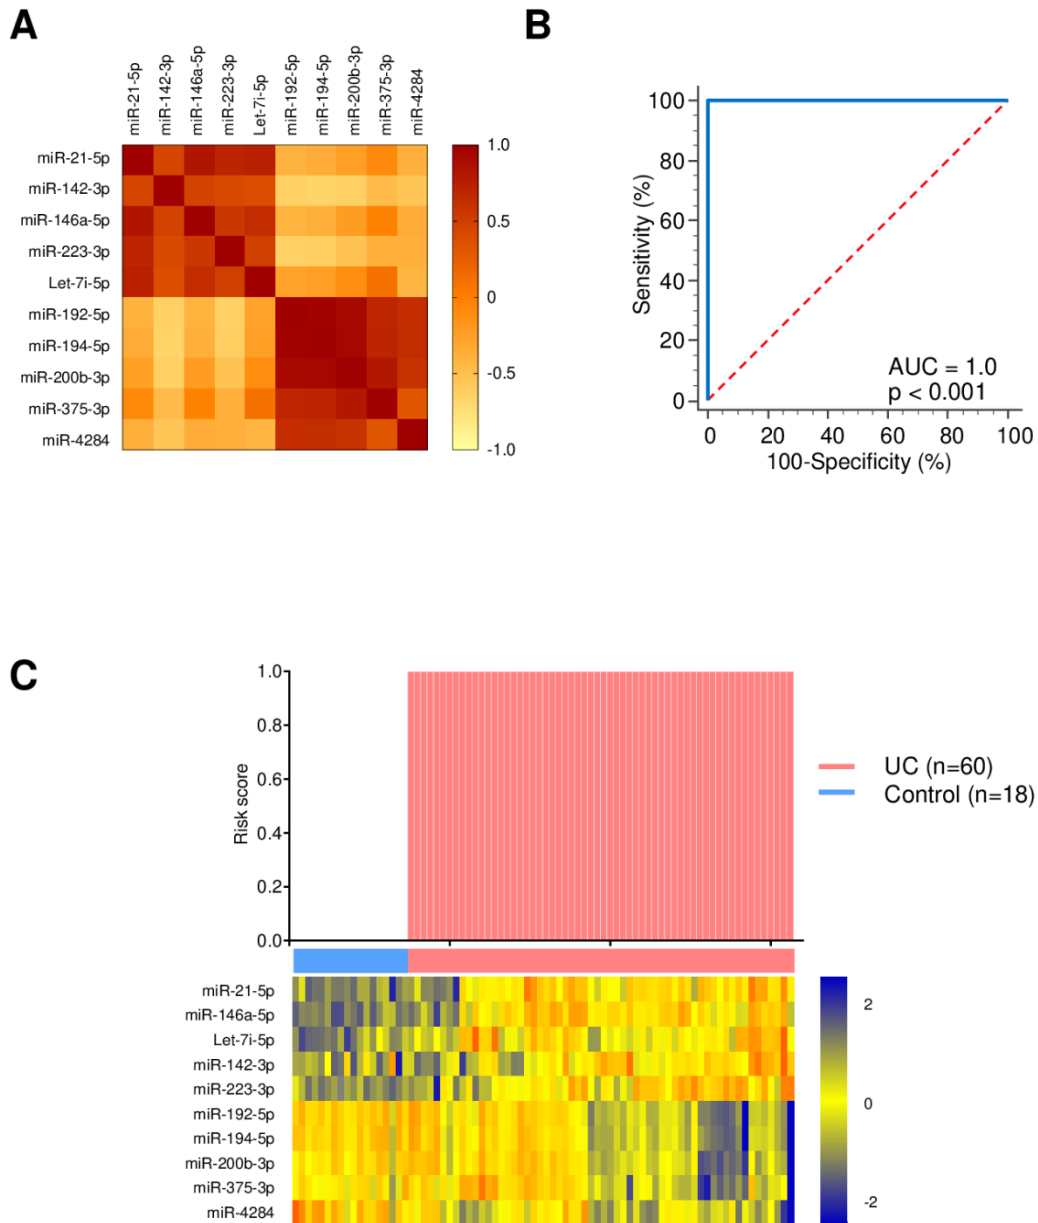

**Supplementary Figure S3.** Diagnostic accuracy of 10-miRNA panel for identifying UC patients.

(A) A correlation matrix displaying the Spearman's rank correlation coefficient for each pair of 10 miRNAs. (B) Receiver operating characteristic (ROC) curves for detecting UC patients using 10-miRNA panel.  $\text{Logit}(\text{risk score}) = 1857.24 + 1471.51 \times \text{let-7i-5p} - 83.19 \times \text{miR-142-3p} + 170.29 \times \text{miR-146a-5p} + 701.10 \times \text{miR-}$

$192.5p - 528.76 \times \text{miR-194-5p} + 471.34 \times \text{miR-200b-3p} - 144.90 \times \text{miR-21-5p} + 398.23 \times \text{miR-223-3p} - 344.13 \times \text{miR-375-3p} - 594.95 \times \text{miR-4284}$ . (C) A waterfall plot representing risk score of each patient. Red and blue columns indicate UC patients and controls, respectively. A heat map illustrating the expression levels of 10 miRNAs expressed differentially between UC patients and controls.
